# Supplementary material
Source: PubMed Central journal article supplement (PMC8208753)
Supplement: cvaa186_supplementary_data.pdf [file cvaa186_supplementary_data.pdf]

**The inflammation-resolution promoting molecule  
resolvin-D1 prevents atrial proarrhythmic remodeling  
in experimental right heart disease**

Roddy Hiram, Feng Xiong, Patrice Naud, Jiening Xiao, Martin Sirois, Jean-François Tanguay,  
Jean-Claude Tardif, and Stanley Nattel

**SUPPLEMENTARY FIGURES and TABLES**

**CVR-2020-0301**

**Online Figure S1. RV Echocardiography.** (A) Right ventricular lateral wall systolic contractility (Sr). (B) Tricuspid annulus plane systolic excursion (TAPSE). (C) Ratio of tricuspid annulus moving velocity (TAMV) during early filling over TAMV during atrial filling. (D) Tricuspid regurgitation (TR) recorded on echocardiography. TR was not observed in control rats. MCT results are regurgitant area in mm<sup>2</sup>, velocity in cm/s, transvalvular peak gradient ( $G_{peak}$ ) and mean peak ( $G_{mean}$ ) of TR in mmHg. Echocardiographic images show TR from apical 4-chamber view (upper pictures) and systolic gradient cross tricuspid valve (lower pictures) in MCT and MCT+RvD1 rats. (Statistical analysis: One-way ANOVA followed by Bonferroni correction. Each point represents result from an individual animal.  $n = 6$  rats per group.)

Online Figure S1

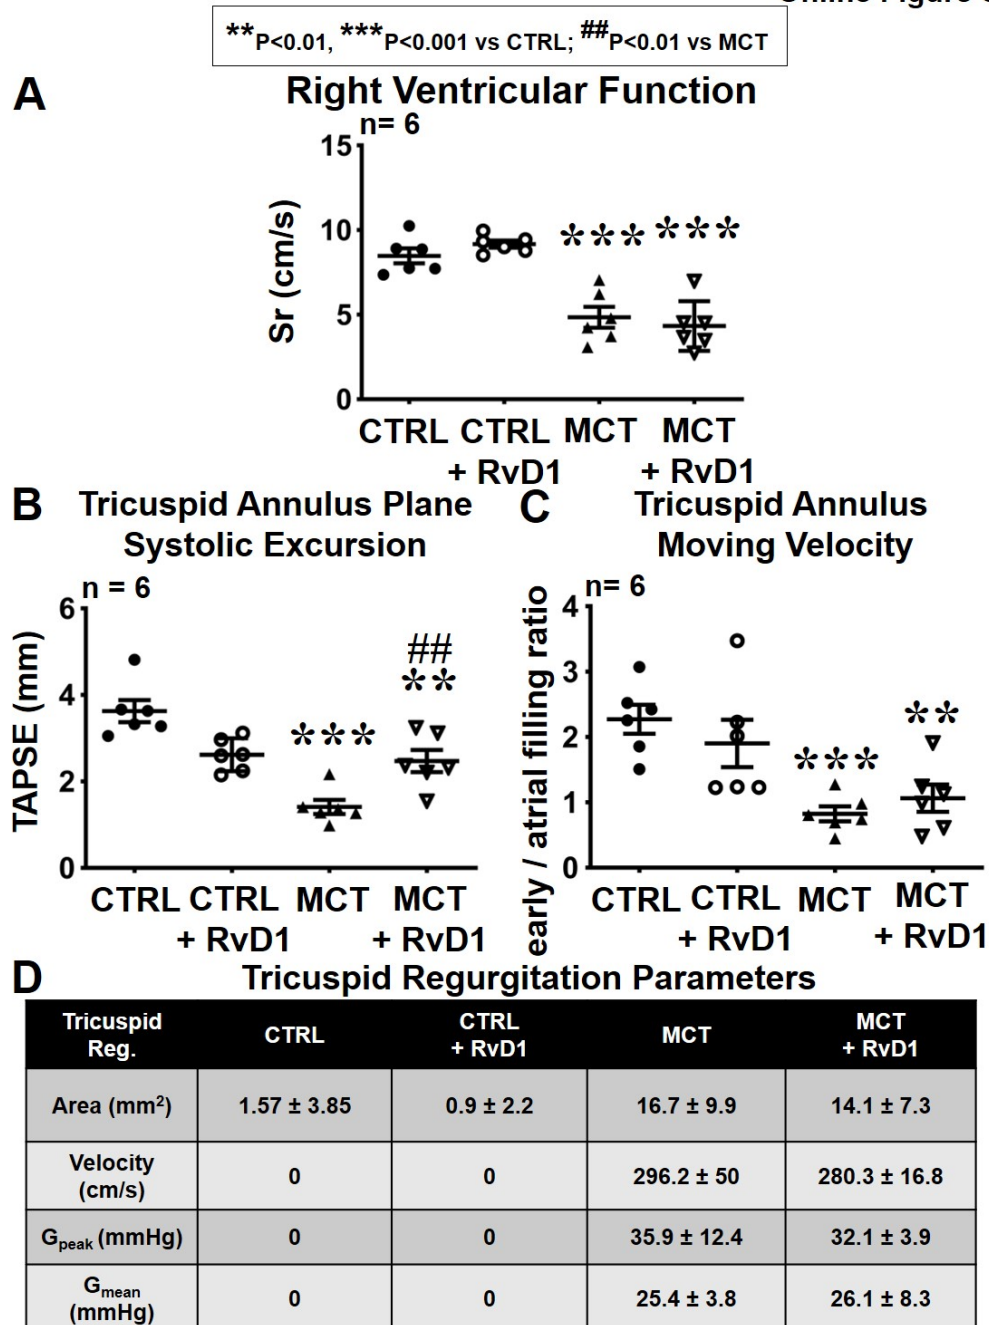

**Online Figure S2. Tricuspid Valve Echocardiography.** Ultrasound imaging from apical four-chamber view and systolic gradient showing normal tricuspid valve function in control rats and tricuspid regurgitation in MCT- and MCT+RvD1-treated rats.

Online Figure S2

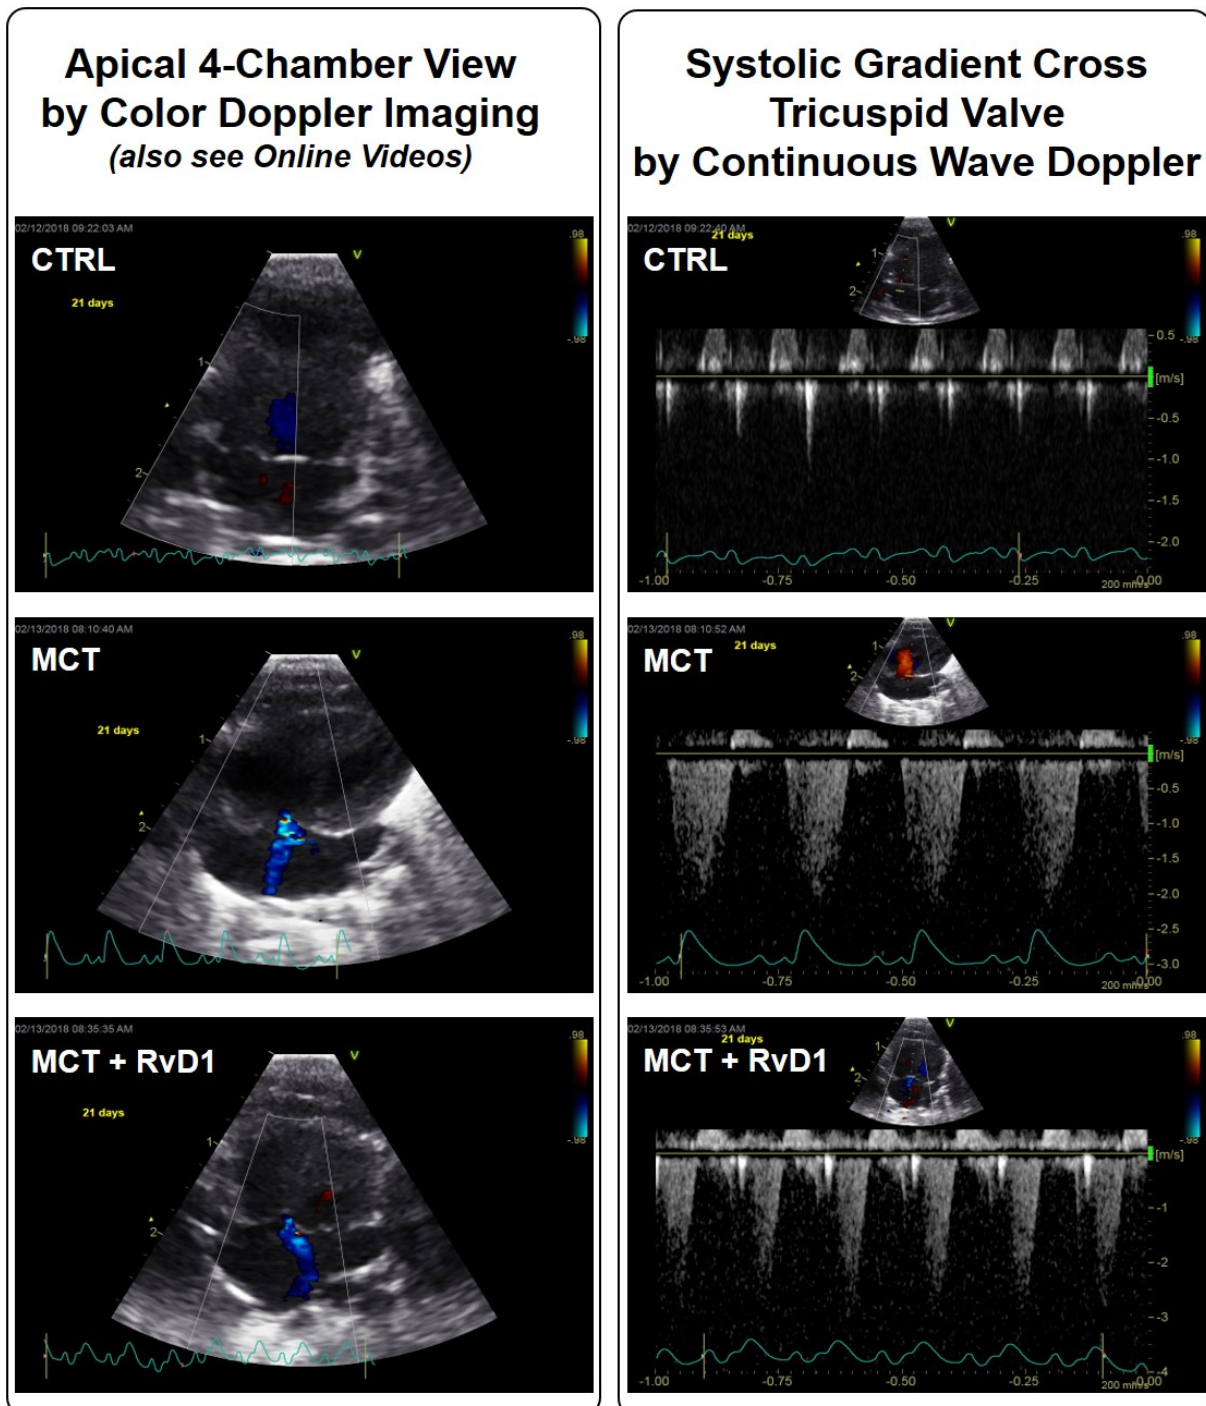

**Online Figure S3. ECG analysis *in vivo*.** ECG analyses for: P wave duration (A), R-R interval (B), Q-T interval (C), QRS duration (D) and P-R interval (E) in control rats vs. monocrotaline- and RvD1-treated rats (*Statistical analysis: One-way ANOVA followed by Bonferroni correction. Each point represents results from an individual animal. n = 6 rats per group.*)

Online Figure S3

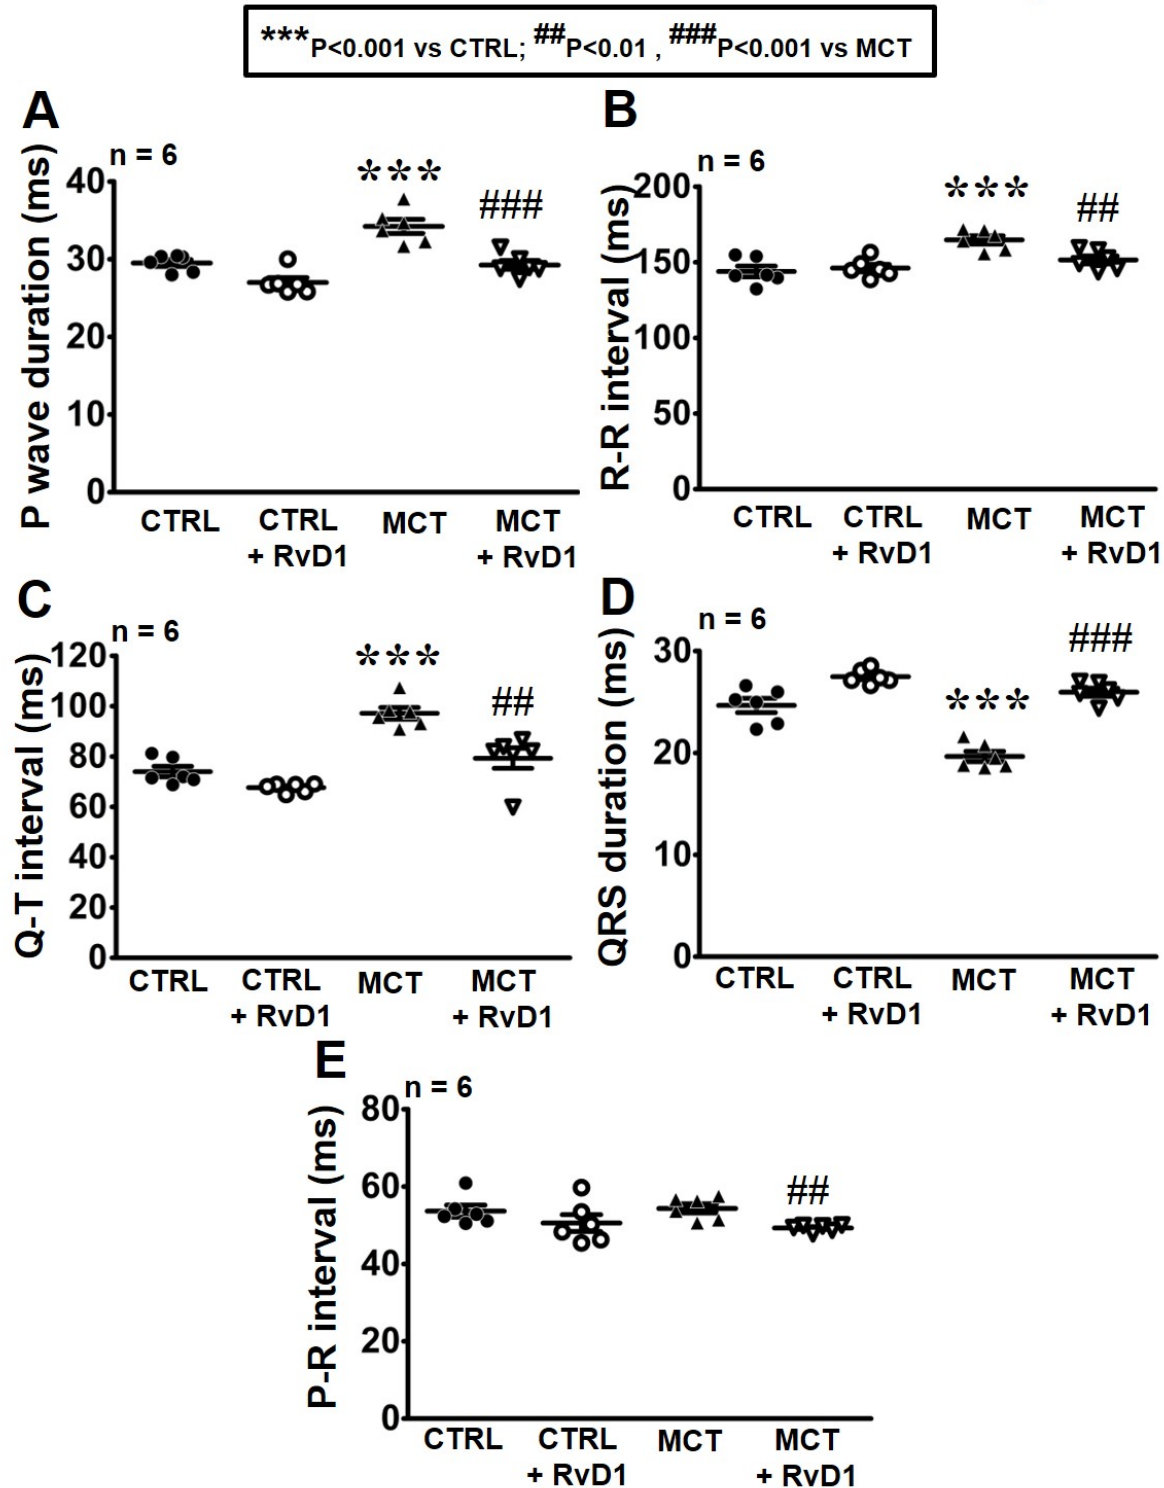

**Online Figure S4. Left Atrial (LA) Optical Mapping.** (A) Left: LA activation maps at BCL 60 ms. Right: Conduction velocity results (mean±SEM). (B) LA effective refractory period (ERP) (mean±SEM). (C) Action potential duration at 80% repolarization (APD<sub>80</sub>; mean±SEM). (D) Percentage of rats in which AF could be induced AF. The numbers in the bars are the number of rats in which AF was induced. (E) Mean duration of induced AF. (*Statistical analysis: A and C: Two-way ANOVA followed by Tukey's test. D: Fisher's exact test. B and E: One-way ANOVA followed by Bonferroni correction. Each point represents results from an individual animal. n = 6 rats per group.*)

Online Figure S4

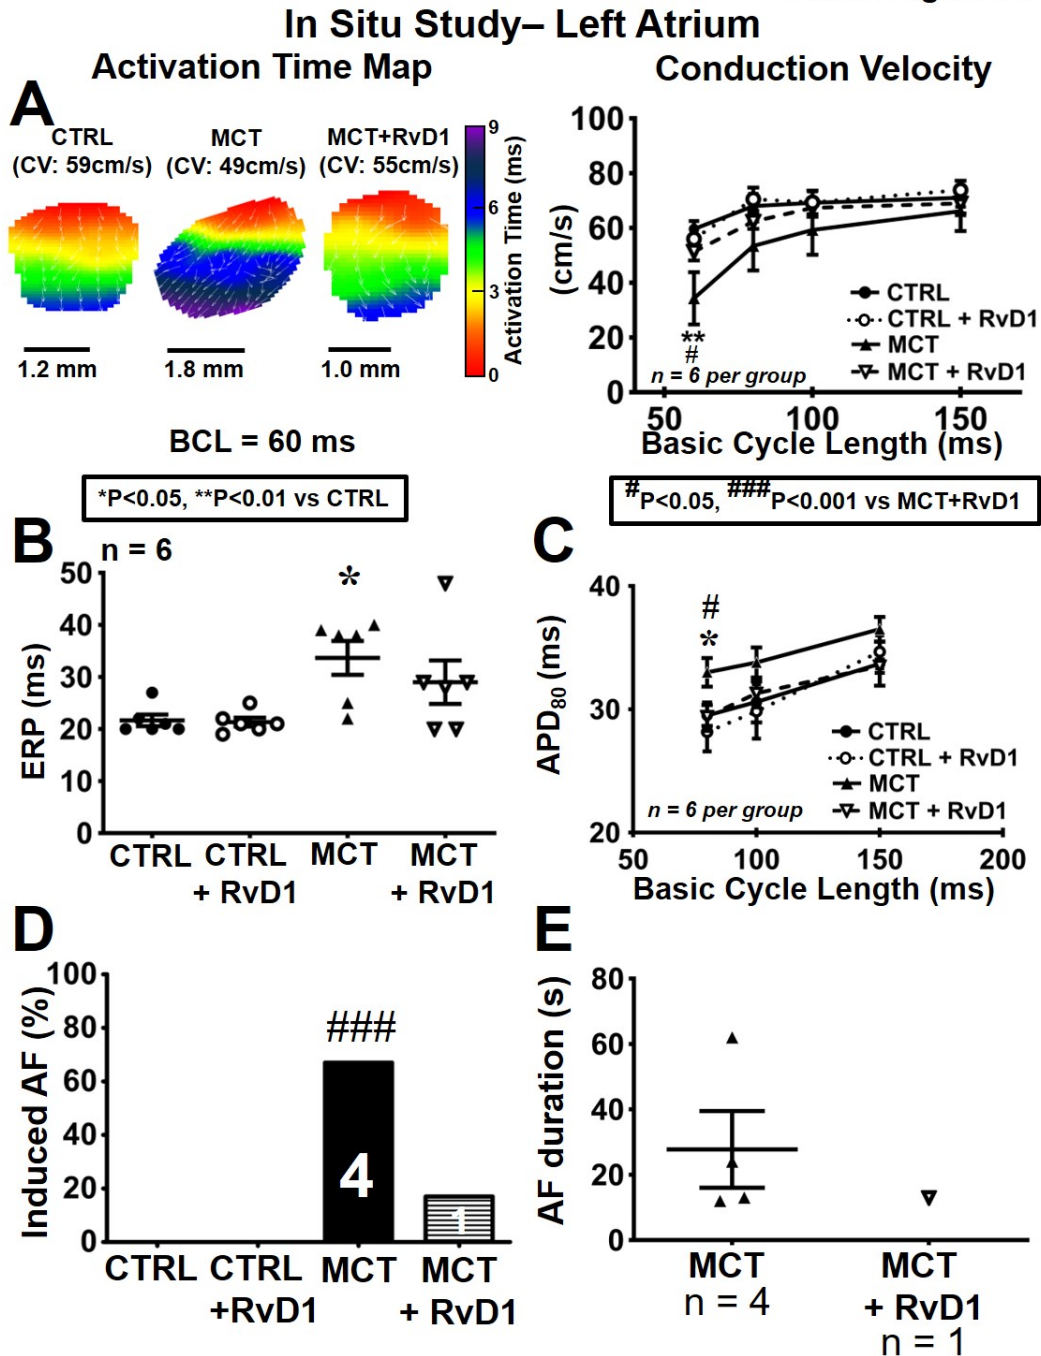



**Online Figure S5. Fibrosis marker and mediator expression.** Messenger RNA expression (qPCR) in arbitrary units (A.U.) in the right (RA) and left (LA) atrium. (Statistical analysis: One-way ANOVA followed by Bonferroni correction. Each point represents results from an individual animal.  $n = 6$  rats per group.)

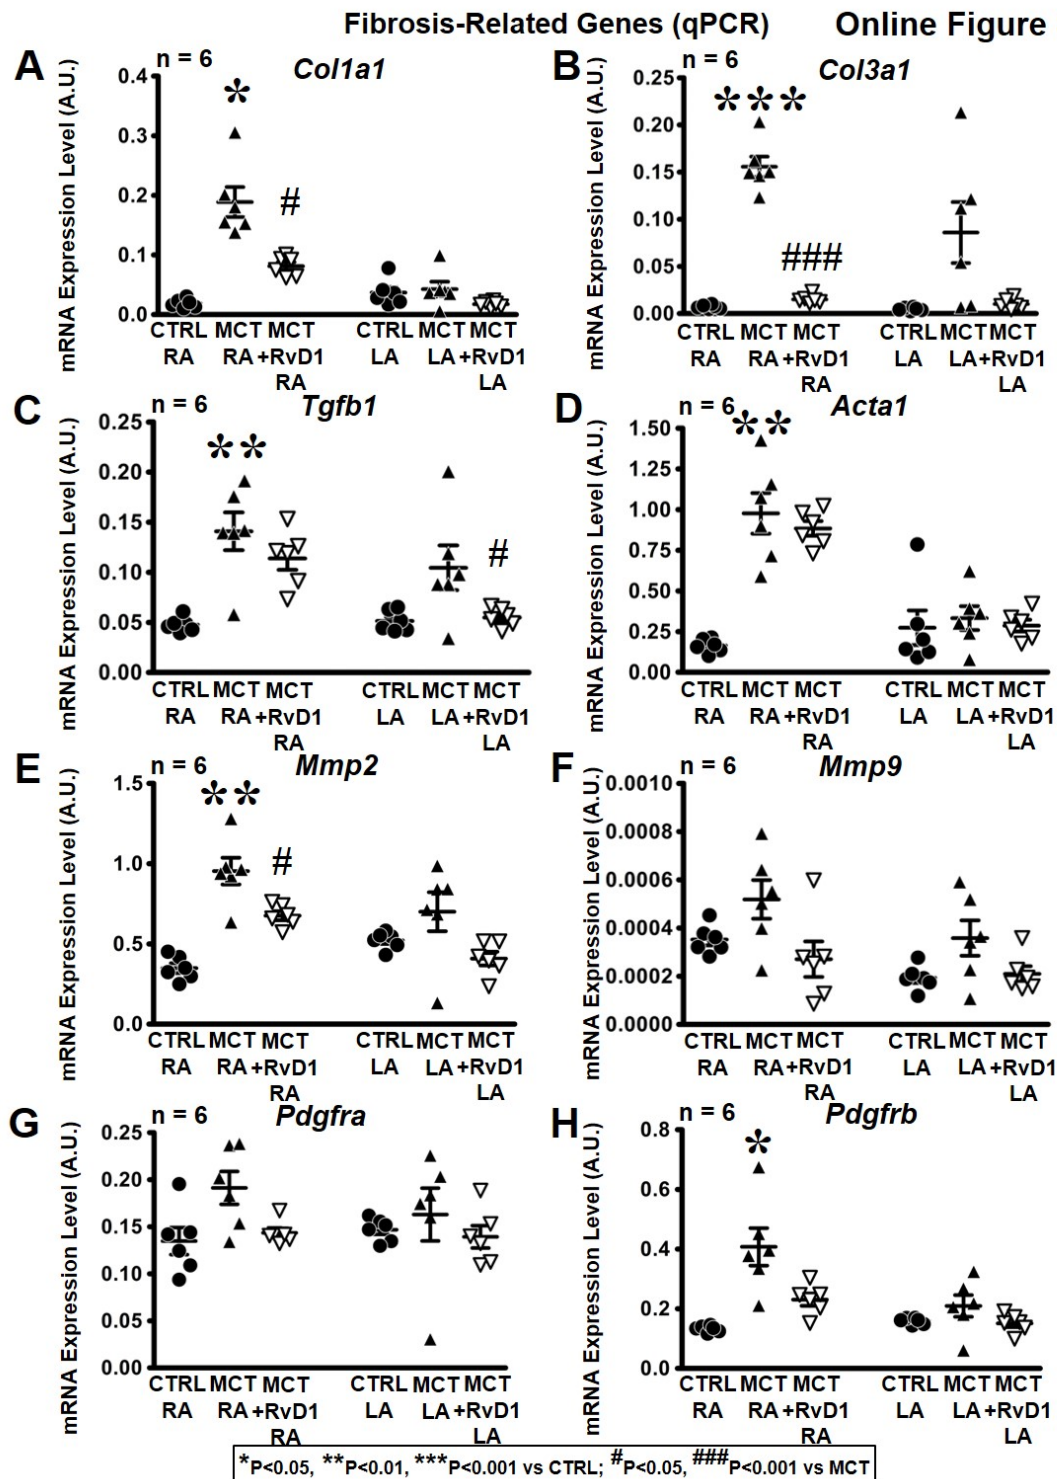

**Online Figure S6. Most Changed Pathways.** Enriched signaling pathways (KOBAS). The top 20 pathways are listed according to log[P] in RA (left) and LA (right). Bold numbers correspond to the pathway with the most dysregulated genes. Abbreviations: Cardio = cardiovascular; Contrac = contraction; Cyt = cytoskeleton; Glyc = glycogen; Infl = inflammation; Musc = muscular; Nucleo = nucleotide; Oxid = oxidation; Reg = regulation; Relax = relaxation; Resp = response; Senesc = senescence; Synth = synthesis; Triacylgly = triacylglyceride.

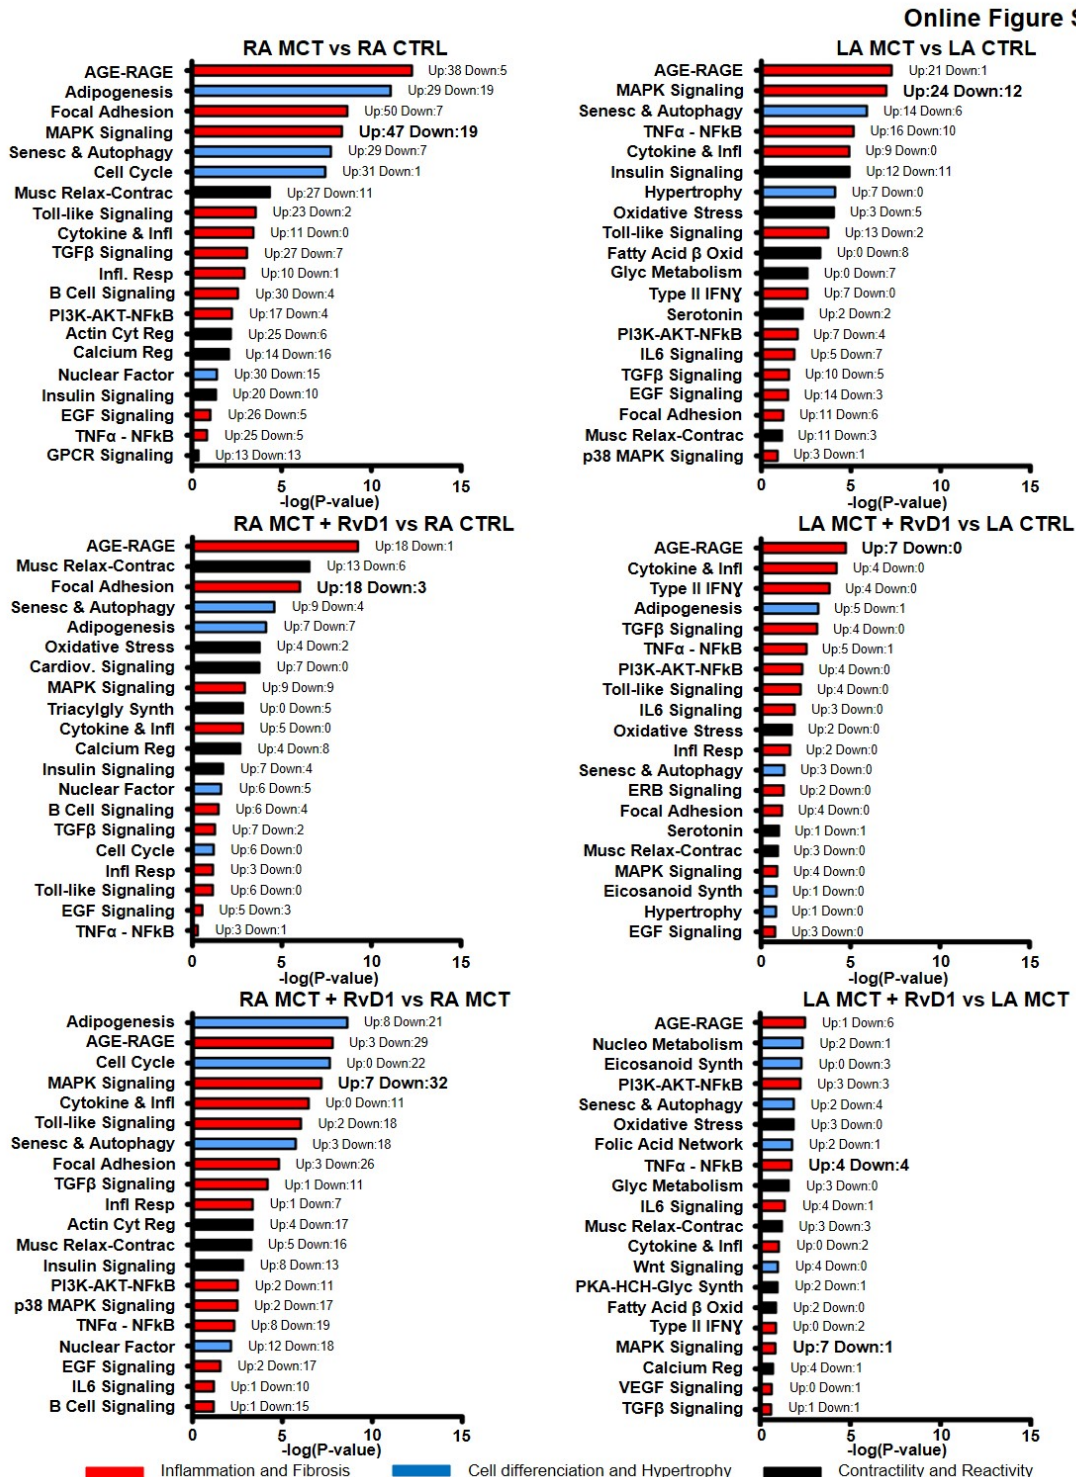

**Online Figure S7. Gap-junction, Ca<sup>2+</sup>-handling, and Ion-channel Genes.** Expression changes (microarray data) in connexin (*Cx40* and *Cx43*), Ca<sup>2+</sup>-handling (*Ryr2*, *Sln*, *Ncx1*, *Serca*, *Plb*), and ion-channel (*Stim1*, *Orai1*, *Cacna1c*, *Kcna1*, *Kcna3*, *Kcna5*, *Kcnj2* and *Kcnq1*) related genes, in the RA from MCT-only rats and MCT+RvD1 rats vs control, and MCT+RvD1 vs MCT-only.

Online Figure S7

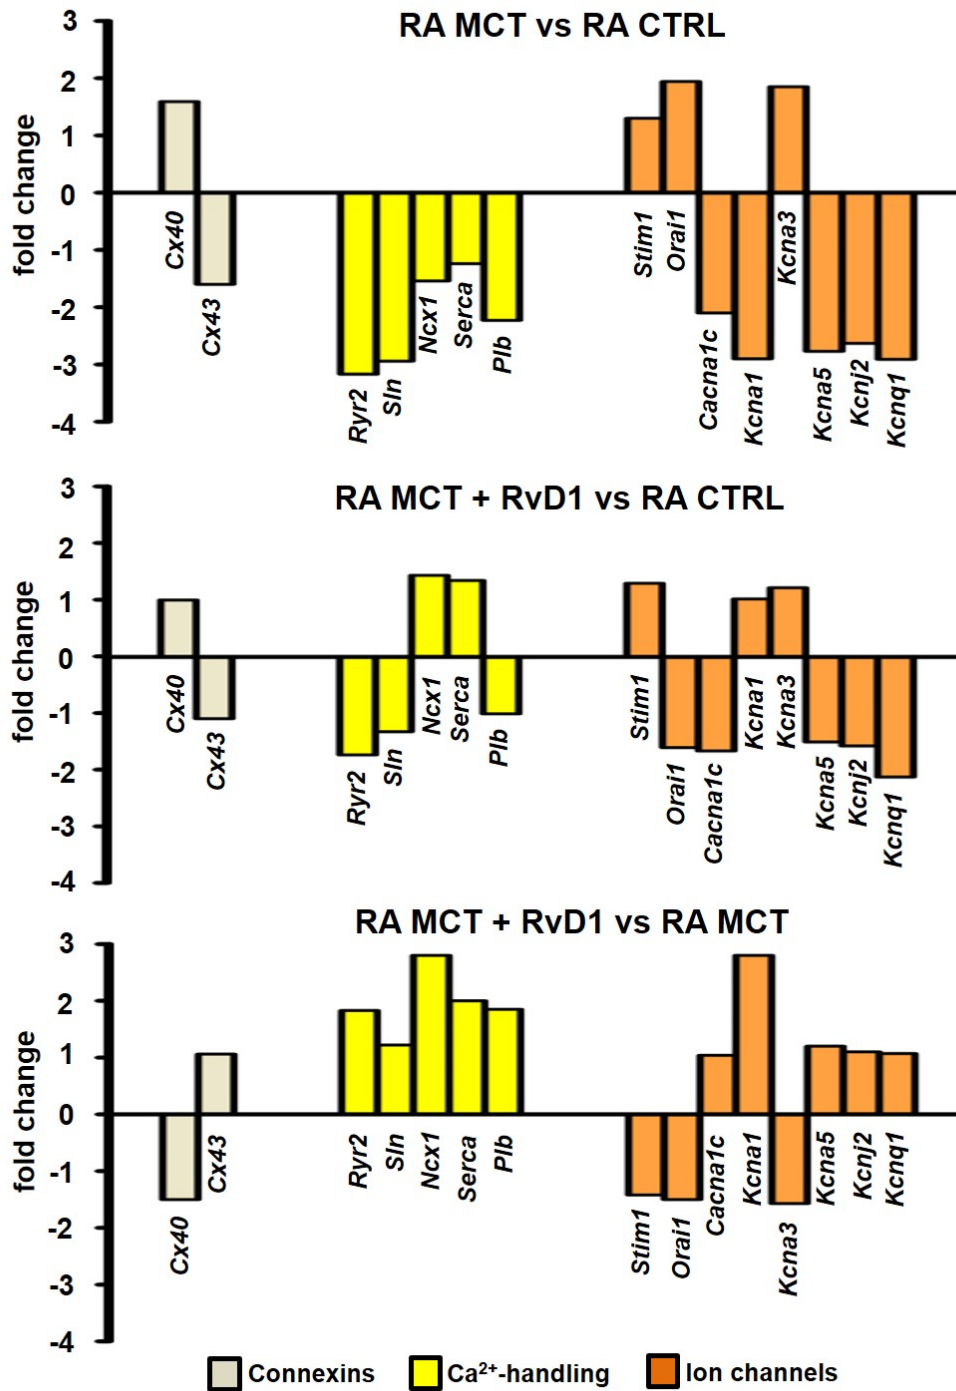

For LA data, see Online Table 3



**Online Figure S8. Inflammasome Related Genes.** (A) Schematic of NLRP3-inflammasome related signaling. Gene expression level, determined by pangenomic transcriptome microarray data, expressed in arbitrary units (A.U.) for inflammasome-related genes: (B) *Nlrp3*, (C) *Asc*, (D) *Casp1*, (E) *Casp8* and (F) *Il1b* in the RA from control, MCT and RvD1- treated rats. (Statistical analysis: One-way ANOVA followed by Bonferroni correction. Each point represents results from an individual animal.  $n = 6$  rats per group.)

Online Figure S8

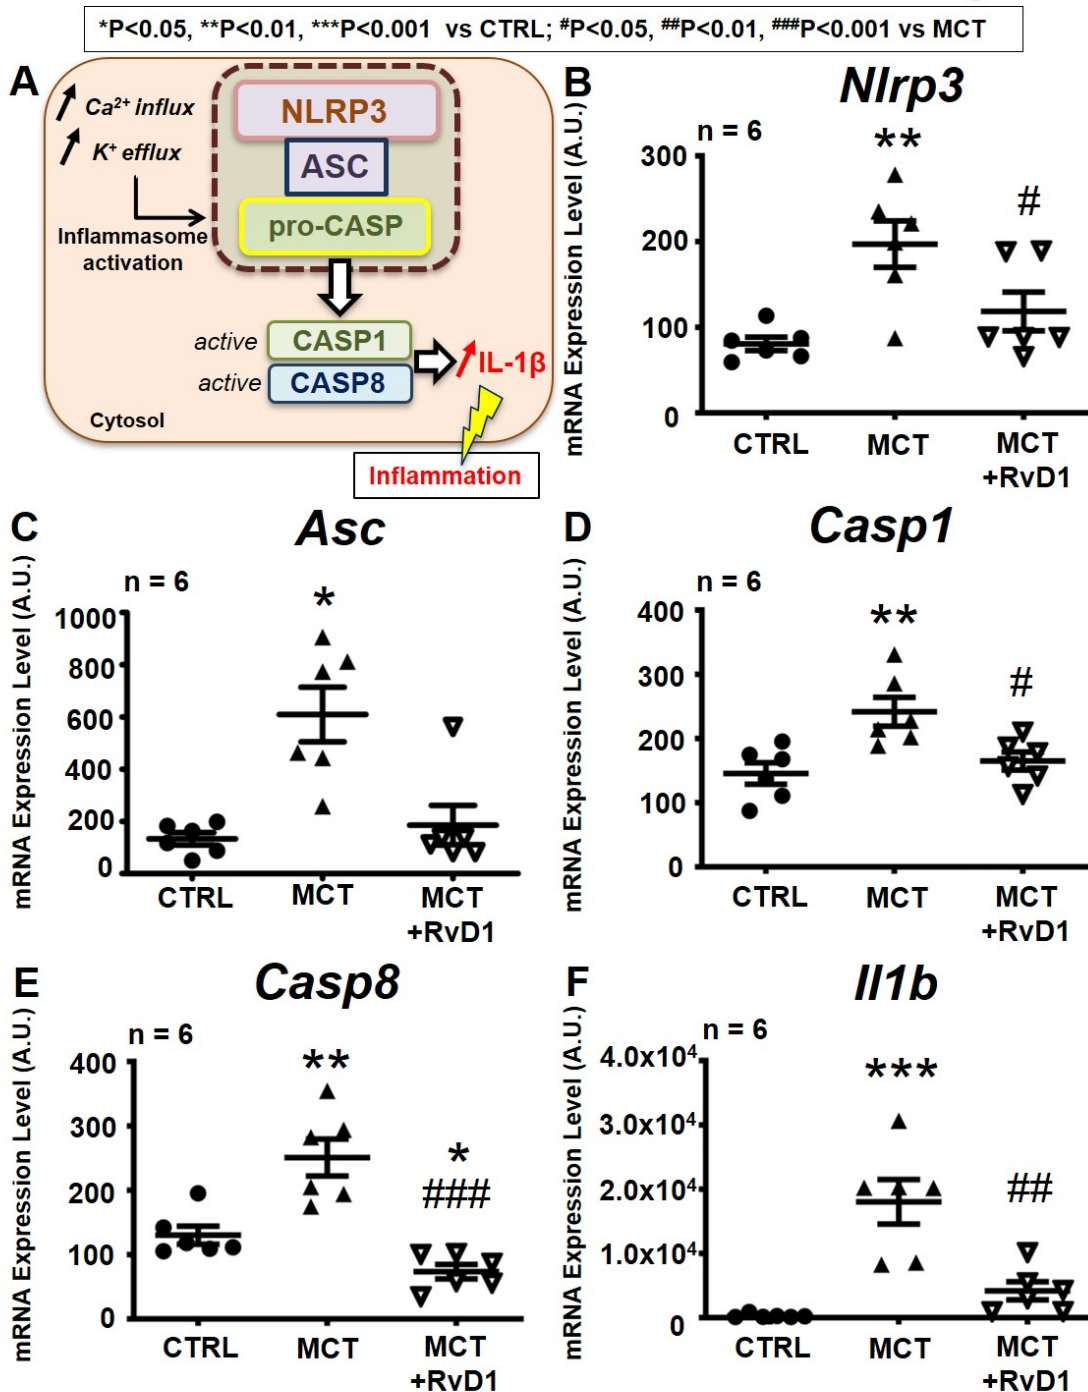

For LA data, see Online Table 3

**Online Figure S9. Inflammation markers.** Gene expression level obtained by RT-qPCR, expressed in arbitrary units (A.U.) for genes involved in inflammation: (A) *Postn*, (B) *Il6*, (C) *Il1 $\beta$*  and (D) *Nos2* in the RA and LA from control, MCT- and MCT+RvD1- treated rats. (Statistical analysis: One-way ANOVA followed by Bonferroni correction. Each point represents results from an individual animal. n = 6 rats per group.)

Online Figure S9

\*P<0.05, \*\*P<0.01, \*\*\*P<0.001 vs CTRL; #P<0.05, ##P<0.01, ###P<0.001 vs MCT

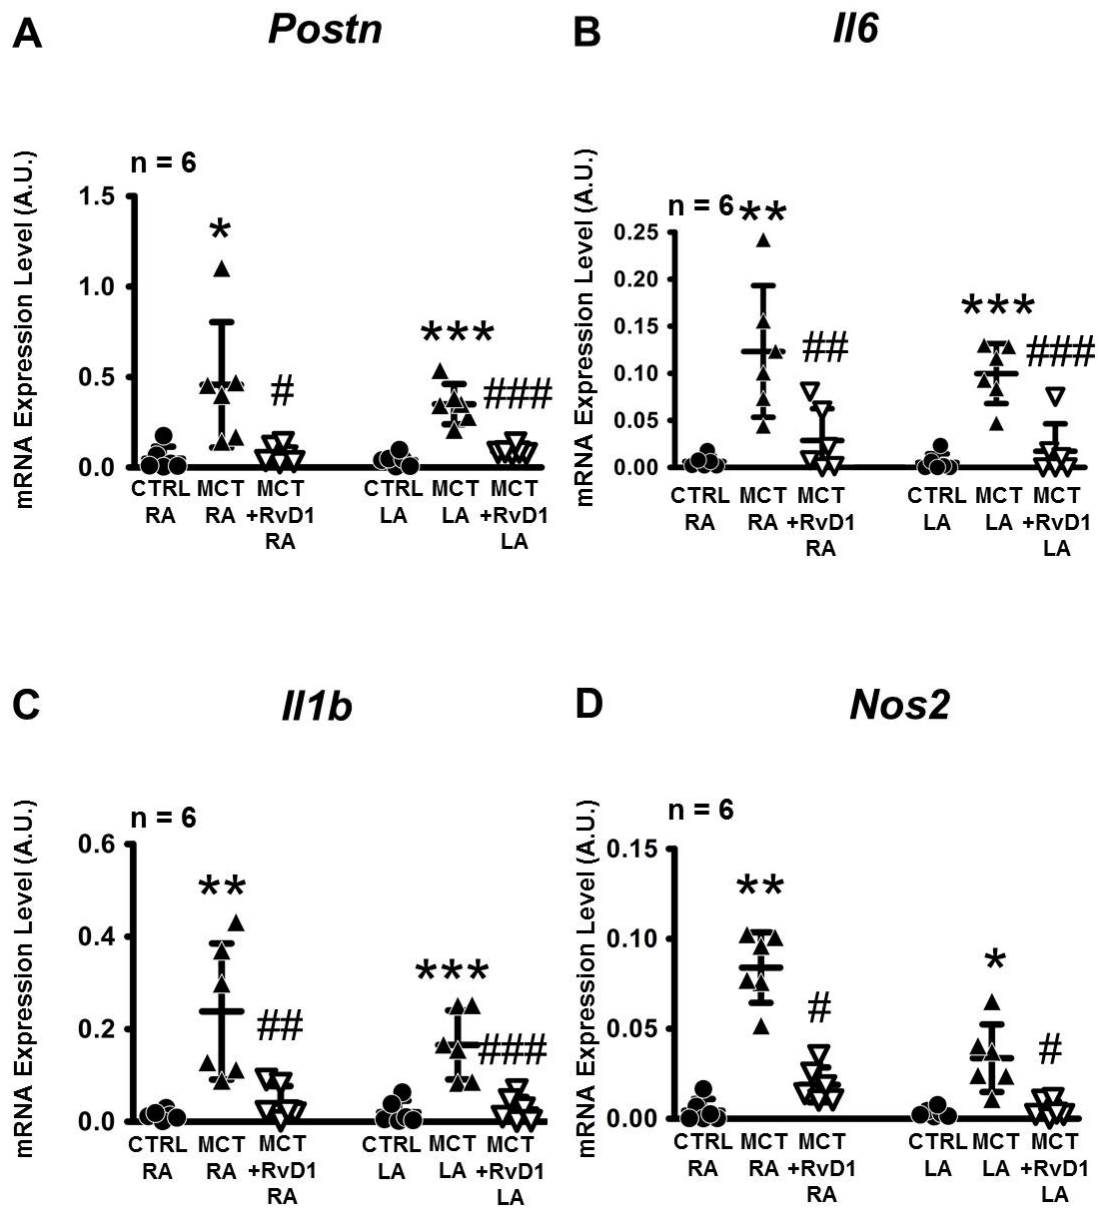

Online Table S1. SYBR green primers.

| Gene                           | Forward Primer            | Reverse Primer             | Amplicon size (bp) |
|--------------------------------|---------------------------|----------------------------|--------------------|
| <i>Gapdh</i>                   | GCATCTTCTTGTGCAGTGCC      | GAGAAGGCAGCCCTGGTAAC       | 105                |
| <i>Il1<math>\beta</math></i>   | TAGCAGCTTTCGACAGTGAGG     | CCACAGCCACAATGAGTGAC       | 180                |
| <i>Mmp2</i>                    | AAGAGGCCTGGTTACCCTGT      | AAGTAGCACCTGGGAGGGAT       | 137                |
| <i>Mmp9</i>                    | TCCAGTAGACAATCCTTGCAATGTG | CTCCGTGATTTCGAGAACTTCCAATA | 110                |
| <i>Nos2</i>                    | AGCCTAGTCAACTACAAGCCC     | GGGGTTTTCTCCACGTTGTTG      | 160                |
| <i>Pdgfra</i>                  | CACCGGATGGTACACTTGCT      | GGCAGGGTATGATGGCAGAA       | 170                |
| <i>Pdgfr<math>\beta</math></i> | GGGGAGACACCGGAGAATAC      | TCGTCTCAGTGACATCCGTG       | 162                |
| <i>Postn</i>                   | CTGCCCCGGCTATATGAGAA      | TGTTGAGTGGTCGTGGCTC        | 108                |
| <i>Tgf<math>\beta</math>1</i>  | CCATGACATGAACCGACCCT      | TGCCGTACACAGCAGTTCTT       | 141                |

Abbreviations: *Gapdh* = Glyceraldehyde-3-Phosphate Dehydrogenase; *Il1 $\beta$*  = Interleukin 1 beta; *Mmp* = Matrix Metalloproteinase; *Nos2* = inducible nitric oxide synthase, *Pdgfr* = Platelet-derived growth factor receptor; *Postn* = Periostin; *Tgf $\beta$ 1* = Transforming growth factor beta 1.

Online Table S2. LV Echocardiographic data. (*n* = 6 rats per group)

|                   |                     |                     |                                  |                                  |
|-------------------|---------------------|---------------------|----------------------------------|----------------------------------|
| <b>BP (mmHg)</b>  | <b>109 ± 1.47</b>   | <b>106 ± 2.6</b>    | <b>96.3 ± 2.53<sup>**</sup></b>  | <b>104.5 ± 3.8<sup>##</sup></b>  |
| <b>LVP (mmHg)</b> | <b>109 ± 0.82</b>   | <b>107.5 ± 2.9</b>  | <b>92.75 ± 4.3<sup>*</sup></b>   | <b>101.75 ± 1.4</b>              |
| <b>LVAWd (mm)</b> | <b>1.77 ± 0.06</b>  | <b>1.8 ± 0.06</b>   | <b>1.6 ± 0.03</b>                | <b>1.9 ± 0.08<sup>#</sup></b>    |
| <b>LVPWd (mm)</b> | <b>1.67 ± 0.04</b>  | <b>1.75 ± 0.08</b>  | <b>1.7 ± 0.03</b>                | <b>1.8 ± 0.08</b>                |
| <b>LVDd (mm)</b>  | <b>8.3 ± 0.35</b>   | <b>8.2 ± 0.45</b>   | <b>7.14 ± 0.19<sup>*</sup></b>   | <b>7.64 ± 0.28</b>               |
| <b>LVDs (mm)</b>  | <b>4.3 ± 0.25</b>   | <b>4.29 ± 0.48</b>  | <b>3.1 ± 0.18<sup>**</sup></b>   | <b>3.87 ± 0.21</b>               |
| <b>LVVd (ml)</b>  | <b>1.26 ± 0.14</b>  | <b>1.24 ± 0.21</b>  | <b>0.83 ± 0.06<sup>*</sup></b>   | <b>0.98 ± 0.1</b>                |
| <b>LVVs (ml)</b>  | <b>0.21 ± 0.03</b>  | <b>0.23 ± 0.1</b>   | <b>0.08 ± 0.01<sup>**</sup></b>  | <b>0.17 ± 0.01</b>               |
| <b>LVEF (%)</b>   | <b>84.06 ± 1.18</b> | <b>83.24 ± 3.17</b> | <b>92.1 ± 0.45<sup>***</sup></b> | <b>88.68 ± 2.22<sup>##</sup></b> |
| <b>LVFS (%)</b>   | <b>48.28 ± 1.35</b> | <b>48.15 ± 3.33</b> | <b>57.07 ± 1.8<sup>**</sup></b>  | <b>55.76 ± 2.83</b>              |

Abbreviations: BP = Aortic blood pressure; LV = left-ventricular; LVP = LV pressure; LVAWd and LVPWd = LV anterior and posterior wall thickness at end of diastole; LVDd and LVDs = LV dimension at end of diastole and systole; LVVd and LVVs = LV ventricular volume at end of diastole and systole; EF = ejection fraction and FS = fraction shortening.

\*P<0.05, \*\*P<0.01, \*\*\*P<0.001 vs CTRL; #P<0.05, ##P<0.01 vs MCT



**Online Table S3. AF Episodes during In Situ Electrophysiology Study.** Distribution of induced AF following pacing of the atrium (RA and LA) at basic cycle lengths (BCL) of 300, 250, 200, 150, 100, 80 and 60 ms. ( $n = 6$  rats per group)

| RA          |   | Pacing BCL (ms) |     |     |     |     |    |    |
|-------------|---|-----------------|-----|-----|-----|-----|----|----|
| ID          |   | 300             | 250 | 200 | 150 | 100 | 80 | 60 |
| CTRL        | 1 |                 |     |     |     | AF  |    |    |
|             | 2 |                 |     |     |     |     |    |    |
|             | 3 |                 |     |     |     |     |    |    |
|             | 4 |                 |     |     |     |     |    |    |
|             | 5 |                 |     |     |     |     |    |    |
|             | 6 |                 |     |     |     |     |    |    |
| CTRL + RVD1 | 1 |                 |     |     |     |     |    |    |
|             | 2 |                 |     |     |     |     |    |    |
|             | 3 |                 |     |     |     |     |    |    |
|             | 4 |                 |     |     |     |     |    |    |
|             | 5 |                 |     |     |     |     |    |    |
|             | 6 |                 |     |     |     |     |    |    |
| MCT         | 1 |                 |     |     |     |     |    | AF |
|             | 2 |                 |     |     |     |     | AF | AF |
|             | 3 |                 |     |     |     |     | AF | AF |
|             | 4 |                 |     |     |     |     | AF | AF |
|             | 5 |                 |     |     | AF  |     | AF | AF |
|             | 6 | AF              |     | AF  |     | AF  | AF | AF |
| MCT + RVD1  | 1 |                 |     |     |     |     |    |    |
|             | 2 |                 |     |     | AF  | AF  | AF | AF |
|             | 3 |                 |     |     |     |     |    |    |
|             | 4 |                 |     |     |     | AF  | AF |    |
|             | 5 |                 |     |     |     |     |    |    |
|             | 6 |                 |     |     |     |     |    |    |

  

| LA          |   | Pacing BCL (ms) |     |     |     |     |    |    |
|-------------|---|-----------------|-----|-----|-----|-----|----|----|
| ID          |   | 300             | 250 | 200 | 150 | 100 | 80 | 60 |
| CTRL        | 1 |                 |     |     |     |     |    |    |
|             | 2 |                 |     |     |     |     |    |    |
|             | 3 |                 |     |     |     |     |    |    |
|             | 4 |                 |     |     |     |     |    |    |
|             | 5 |                 |     |     |     |     |    |    |
|             | 6 |                 |     |     |     |     |    |    |
| CTRL + RVD1 | 1 |                 |     |     |     |     |    |    |
|             | 2 |                 |     |     |     |     |    |    |
|             | 3 |                 |     |     |     |     |    |    |
|             | 4 |                 |     |     |     |     |    |    |
|             | 5 |                 |     |     |     |     |    |    |
|             | 6 |                 |     |     |     |     |    |    |
| MCT         | 1 |                 |     |     |     |     |    |    |
|             | 2 |                 |     |     | AF  |     | AF | AF |
|             | 3 |                 |     |     |     |     | AF | AF |
|             | 4 |                 |     |     |     |     | AF | AF |
|             | 5 |                 |     |     |     |     | AF | AF |
|             | 6 |                 |     |     |     |     |    |    |
| MCT + RVD1  | 1 |                 |     |     |     |     |    |    |
|             | 2 |                 |     |     |     |     | AF |    |
|             | 3 |                 |     |     |     |     |    |    |
|             | 4 |                 |     |     |     |     |    |    |
|             | 5 |                 |     |     |     |     |    |    |
|             | 6 |                 |     |     |     |     |    |    |

**Online Table S4. LA gene expression changes (pangenomic microarray data).** Left: expression changes in connexin, Ca<sup>2+</sup>-handling, ion-channel and NLRP3 inflammasome related genes. Right: Top 10 dysregulated molecular functions. (Glu = glutamate; Heterod = heterodimerization; Homod = homodimerization; Id = identical; R = receptor; Synt = synthesis).

### Left Atrium

| Genes          | Fold Change |                  |                 | MCT vs CTRL                                    |               |       |
|----------------|-------------|------------------|-----------------|------------------------------------------------|---------------|-------|
|                | MCT vs CTRL | MCT+RvD1 vs CTRL | MCT+RvD1 vs MCT | Molecular Function                             | -log(P-value) | Count |
| <i>Cx40</i>    | -1.07       | -1.18            | -1.1            | Growth Factor Activity                         | 5.816213      | 122   |
| <i>Cx43</i>    | -1.02       | 1.01             | 1.03            | Drug binding                                   | 5.541802      | 19    |
| <i>Ryr2</i>    | -1.04       | -1.02            | 1.02            | Protein Heterod                                | 4.589023      | 48    |
| <i>Sln</i>     | -1.02       | -1.04            | -1.02           | Ferric ion binding                             | 3.944952      | 8     |
| <i>Ncx1</i>    | 1.001       | 1.029            | 1.027           | DNA binding                                    | 3.120187      | 16    |
| <i>Serca</i>   | -1.001      | -1.004           | -1.003          | Chemokine Activity                             | 3.011842      | 8     |
| <i>Plb</i>     | -1.008      | -1.02            | -1.007          | Protein homod                                  | 2.861922      | 56    |
| <i>Stim1</i>   | -1.01       | -1.0004          | 1.008           | Cytokine Activity                              | 2.710883      | 17    |
| <i>Orai1</i>   | -1.016      | -1.11            | -1.09           | Cytokine binding                               | 2.690681      | 6     |
| <i>Cacna1c</i> | -1.026      | 1.0004           | 1.027           | Id protein binding                             | 2.581951      | 46    |
| <i>Kcna1</i>   | -1.056      | -1.03            | 1.023           | <i>Average number of deregulated genes: 35</i> |               |       |
| <i>Kcna3</i>   | 1.022       | 1.059            | 1.04            | MCT + RvD1 vs CTRL                             |               |       |
| <i>Kcna5</i>   | -1.018      | 1.024            | 1.043           | Molecular Function                             | -log(P-value) | Count |
| <i>Kcnj2</i>   | 1.016       | 1.046            | -1.002          | Chemokine activity                             | 3.581389      | 14    |
| <i>Kcnq1</i>   | 1.013       | 1.114            | 1.09            | Protein binding                                | 2.905490      | 24    |
| <i>Nlrp3</i>   | 1.12        | 1.2              | 1.07            | Nucleotide binding                             | 2.544531      | 59    |
| <i>Asc</i>     | 1.03        | 1.02             | -1.01           | Glucosyltransferase                            | 2.364743      | 10    |
| <i>Casp1</i>   | 1.12        | 1.11             | -1.01           | H <sup>+</sup> transport, ATP synt             | 2.355475      | 8     |
| <i>Casp8</i>   | 1.024       | 1.07             | 1.04            | Oxygen transporter                             | 2.354552      | 8     |
| <i>Il1b</i>    | 2.36        | 1.84             | -1.28           | CXCR chemokine R                               | 2.341722      | 6     |
|                |             |                  |                 | Ionotropic Glu R                               | 2.246831      | 10    |
|                |             |                  |                 | Id protein binding                             | 2.206171      | 10    |
|                |             |                  |                 | Actin binding                                  | 2.129162      | 46    |
|                |             |                  |                 | <i>Average number of deregulated genes: 20</i> |               |       |

**Online Table S5. Gene expression of G-protein coupled receptors (GPCRs) for pro-resolution mediators.** Pangenomic transcriptome microarray data for RA and LA expression of GPCRs (*Alx/Fpr2*, *Ltb4r*, *Chemr23*, *Gpr18* and *Gpr37*) that are implicated in effects of pro-resolving mediator ligands (RvD1-5, RvE1-2, LXA4, MAR1 and Protectin D1).

## Right Atrium

| Receptors (genes) | Specialized Pro-resolving Mediators | mRNA expression level (A.U.) |             |              |
|-------------------|-------------------------------------|------------------------------|-------------|--------------|
|                   |                                     | CTRL                         | MCT         | MCT + RvD1   |
| <i>Alx/Fpr2</i>   | RvD1, LXA4, MAR1                    | 3.38 ± 0.13                  | 3.8 ± 0.17  | 3.3 ± 0.14   |
| <i>Ltb4r</i>      | RvE1, RvE2 (antagonists)            | 3.62 ± 0.17                  | 3.72 ± 0.15 | 3.51 ± 0.16  |
| <i>Chemr23</i>    | RvE1, RvE2                          | 8.4 ± 0.3                    | 8.2 ± 0.5   | 10.4 ± 0.2** |
| <i>Gpr18</i>      | RvD2                                | 3.28 ± 0.11                  | 3.26 ± 0.09 | 3.34 ± 0.21  |
| <i>Gpr37</i>      | Protectin D1                        | 5.63 ± 0.2                   | 6.27 ± 0.14 | 6.01 ± 0.11  |

## Left Atrium

| Receptors (genes) | Specialized Pro-resolving Mediators | mRNA expression level (A.U.) |             |             |
|-------------------|-------------------------------------|------------------------------|-------------|-------------|
|                   |                                     | CTRL                         | MCT         | MCT + RvD1  |
| <i>Alx/Fpr2</i>   | RvD1, LXA4, MAR1                    | 3.5 ± 0.1                    | 3.5 ± 0.23  | 3.9 ± 0.2   |
| <i>Ltb4r</i>      | RvE1, RvE2 (antagonists)            | 3.54 ± 0.07                  | 3.67 ± 0.1  | 3.80 ± 0.14 |
| <i>Chemr23</i>    | RvE1, RvE2                          | 9 ± 0.13                     | 8.93 ± 0.24 | 9.11 ± 0.26 |
| <i>Gpr18</i>      | RvD2                                | 3.26 ± 0.15                  | 2.9 ± 0.21  | 3.4 ± 0.11  |
| <i>Gpr37</i>      | Protectin D1                        | 5.65 ± 0.14                  | 5.8 ± 0.18  | 5.63 ± 0.26 |
